# Supplementary material for: Resident memory T cells in tumor-distant tissues fortify against metastasis formation
Source: PubMed Central journal article supplement (PMC8204287; doi:10.1016/j.celrep.2021.109118), 2021-05-11
Supplement: NIHMS1703505-supplement-1.pdf [file NIHMS1703505-supplement-1.pdf]

**Cell Reports, Volume 35**

**Supplemental information**

**Resident memory T cells in tumor-distant tissues  
fortify against metastasis formation**

**Laura S. Christian, Liuyang Wang, Bryan Lim, Dachuan Deng, Haiyang Wu, Xiao-Fan Wang, and Qi-Jing Li**

## **Resident memory T cells in tumor-distant tissues fortify in metastasis formation**

Laura S Christian<sup>1†</sup>, Liuyang Wang<sup>2†</sup>, Bryan Lim<sup>1</sup>, Dachuan Deng<sup>3</sup>, Haiyang Wu<sup>3</sup>, Xiao-Fan Wang<sup>4</sup>, Qi-Jing Li<sup>1\*</sup>

### **Supplemental Information**

**Supplementary Figures 1-5**

**Supplementary Tables 1-3**

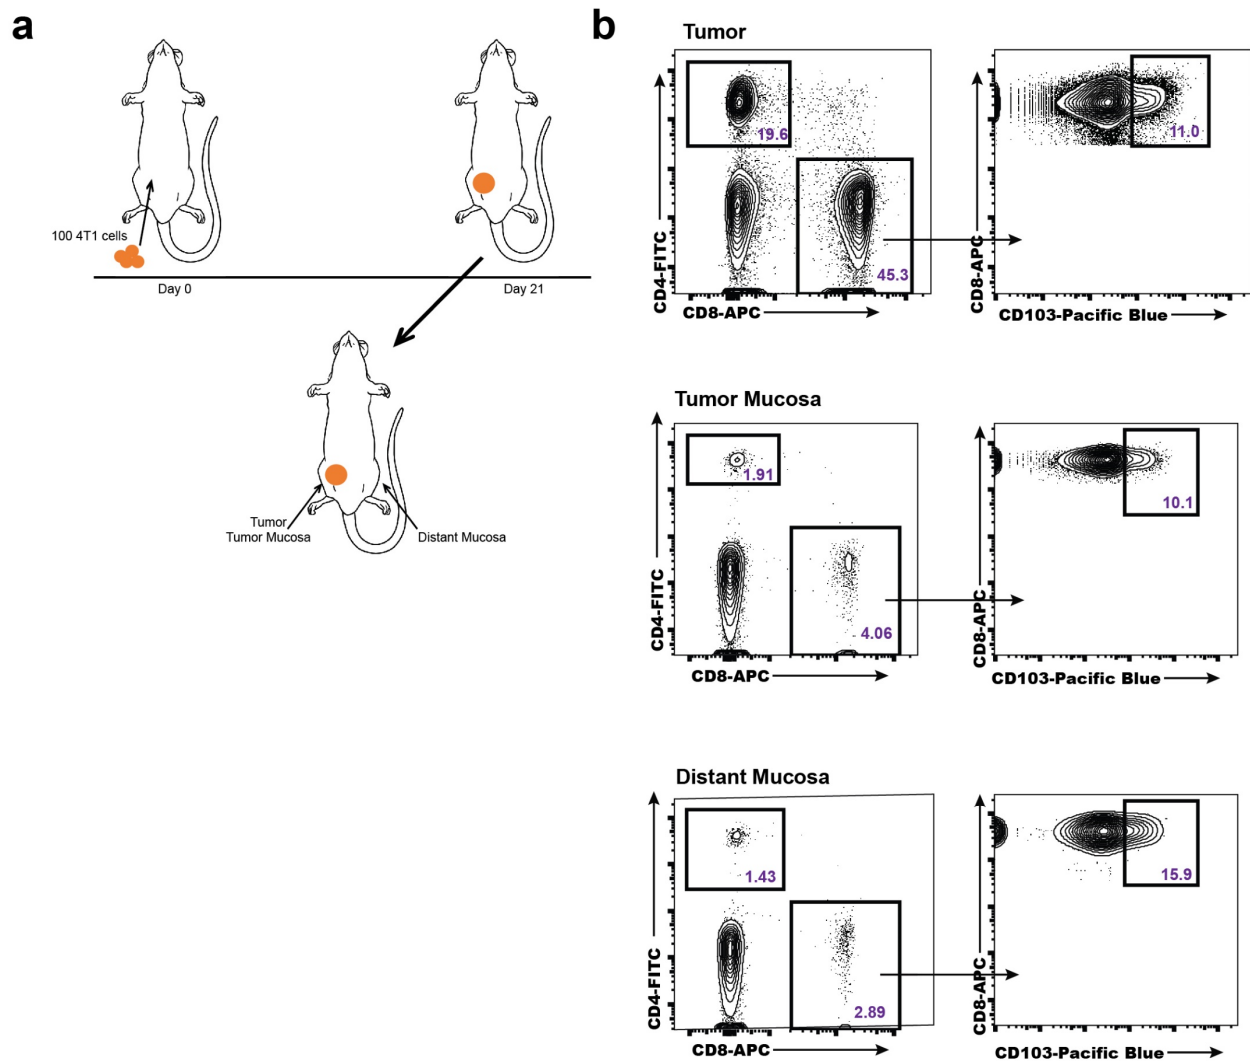

**Figure S1. Related to Figure 1: Experimental design for tumor  $T_{RM}$  generation and sample collection.** **a**, Experiments using titrating amounts of 4T1 tumor cells revealed that orthotopic injection of 100 4T1 cells into the mammary fat pad of 4T1 mice caused robust tumor formation at 21 days post injection. The diagram shows the location of the tumor, tumor mucosa and distant mucosa, the main sites of sample collection. **b**, Representative flow cytometry plots and gating of  $T_{RMS}$  in the tumor, tumor mucosa and distant mucosa at d21 post tumor cell injection.

Distant mucosa

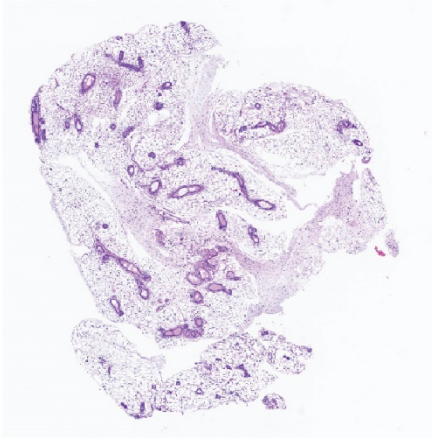

Lung

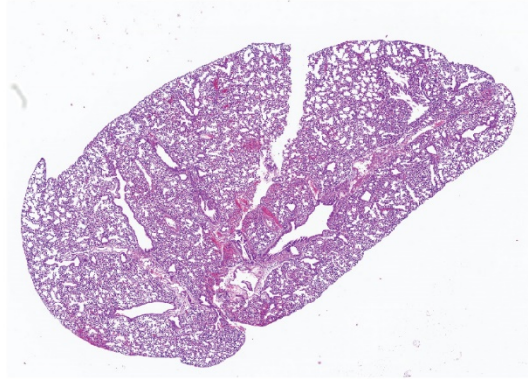

**Figure S2. Related to Figure 1: Metastatic tumors are not found in the distant mucosa or lung 3 weeks post tumor implantation.** Representative H&E images of distant mucosa or lung harvested from 4T1 tumor-bearing mice 3 weeks post tumor implantation reveals there are no tumor metastases present at this early time-point.

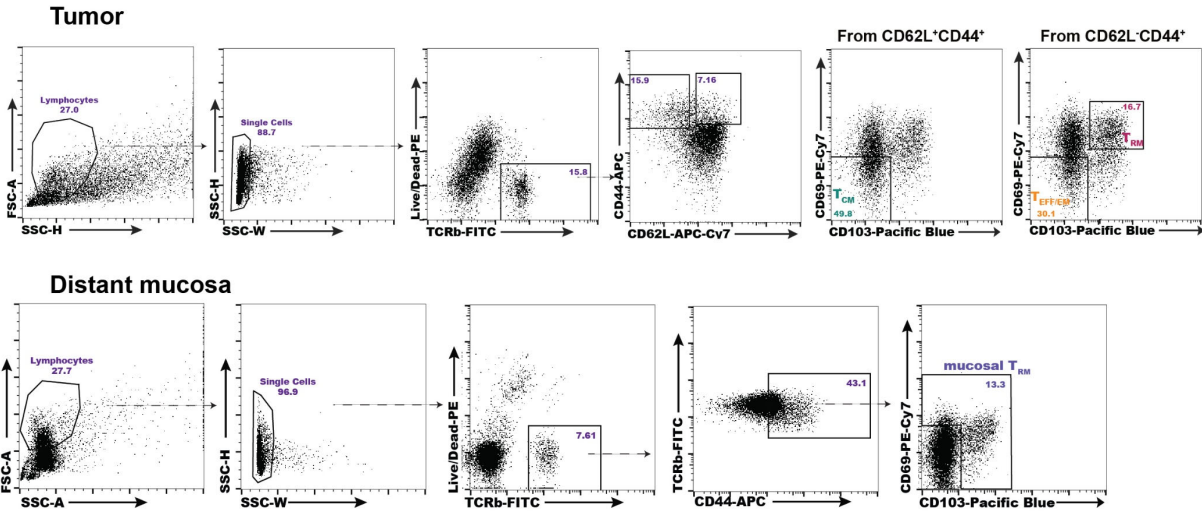

**Figure S3. Related to Figure 2: Sorting strategy for single cell RNA-sequencing sample collection.** Representative plots showing the flow cytometry sorting strategy for tumor  $T_{EMS}$ ,  $T_{CMS}$ ,  $T_{RMS}$  and distant mucosa  $T_{RMS}$  for single-cell RNA-sequencing sample collection. Tumors were harvested 21 days after tumor injection and cells were stained for various cell surface markers as detailed above.

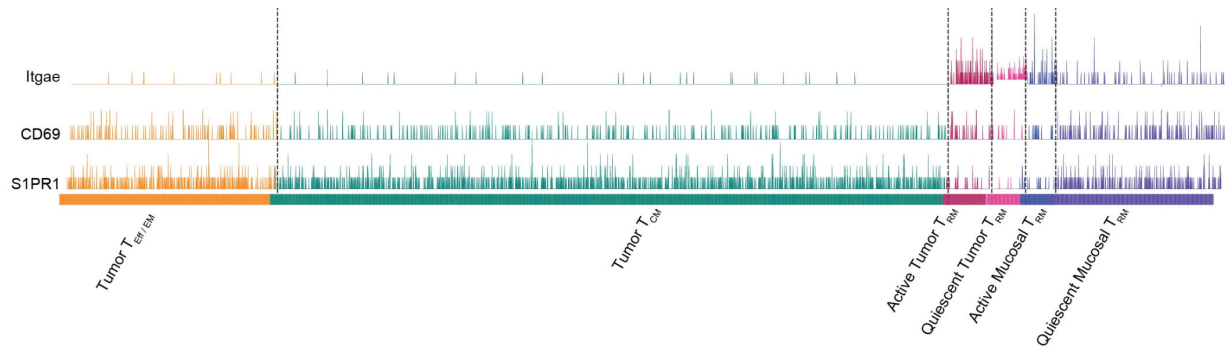

**Figure S4. Related to Figure 3: Gene expression of T<sub>RM</sub> markers confirms heterogeneity of tumor T<sub>RM</sub>s.** GeneTrac analysis of T<sub>RM</sub> defining marker *Itgae* (CD103) is upregulated only in the T<sub>RM</sub> populations, concomitant with reduced *S1pr1* expression.

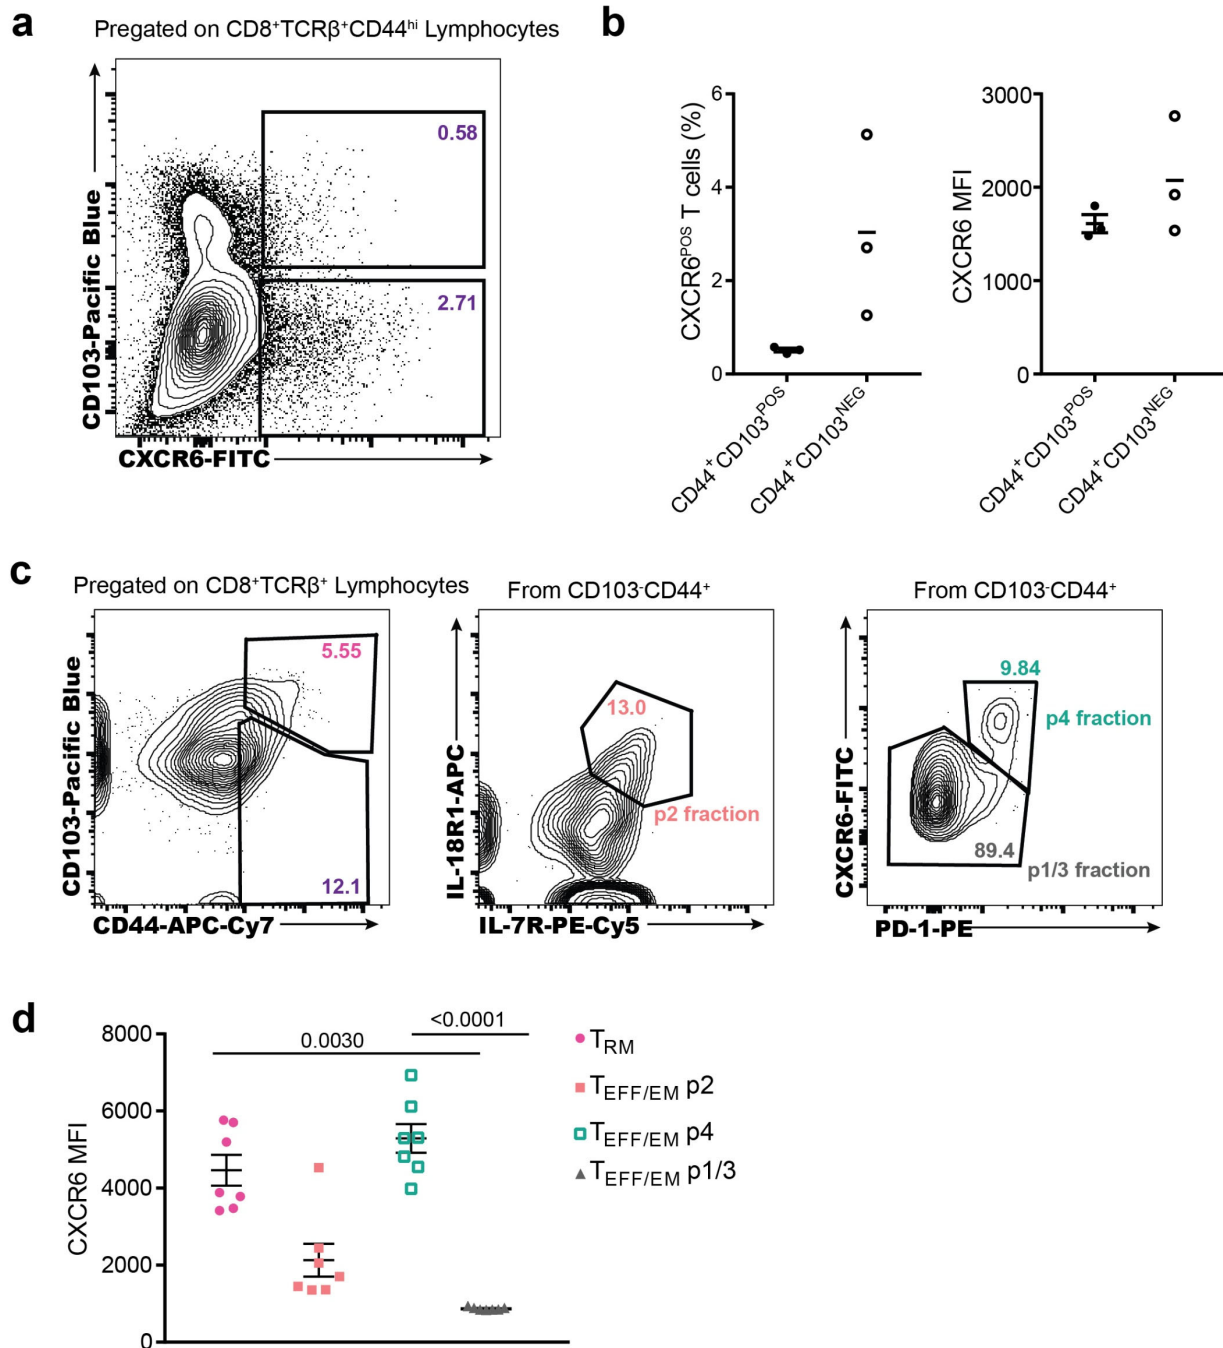

**Figure S5. Related to Figure 5: Intra-tumoral T<sub>EFF/EM</sub> p4 cells preferentially express CXCR6.** **a**, Representative flow plot on 4T1 tumor shows that intra-tumor T<sub>EFF/EM</sub>s express more CXCR6 than T<sub>RM</sub>s. These data are graphed by **b**, the percentage of CD44<sup>+</sup>CD103<sup>POS/NEG</sup> cells expressing CXCR6<sup>+</sup> and by CXCR6 MFI. **c**, Representative flow plots of 4T1 tumor shows that the intra-tumor T<sub>EFF/EM</sub> p4 population expresses more CXCR6 than T<sub>EFF/EM</sub> p2. These data are graphed by **d**, CXCR6 MFI. Symbols represent individual mice and error bars represent mean ± s.e.m. p<0.05, Kruskal-Wallis test with multiple comparisons.

Supplementary Table 1: QC analysis of TCR $\beta$  repertoire sequencing samples related to Figure 1.

| Sample ID        | Total RNA | Total Mapped Reads | Unique TCR Clonotypes | Mean Read Per TCR |
|------------------|-----------|--------------------|-----------------------|-------------------|
| Tumor 1          | 500ng     | 84329              | 2626                  | 32.11             |
| Tumor 2          | 500ng     | 37368              | 2236                  | 16.71             |
| Tumor 3          | 500ng     | 82313              | 24636                 | 3.34              |
| Tumor Mucosa 1   | 500ng     | 16869              | 91                    | 185.37            |
| Tumor Mucosa 2   | 500ng     | 36775              | 1244                  | 29.56             |
| Tumor Mucosa 3   | 500ng     | 15249              | 70                    | 217.84            |
| Distant Mucosa 1 | 500ng     | 27106              | 88                    | 308.02            |
| Distant Mucosa 2 | 500ng     | 20882              | 135                   | 154.68            |
| Distant Mucosa 3 | 500ng     | 12359              | 191                   | 64.71             |
| WT Mucosa 1      | 300ng     | 138109             | 1299                  | 106.32            |
| WT Mucosa 2      | 300ng     | 121488             | 25145                 | 4.83              |
| WT Mucosa 3      | 300ng     | 4404               | 1392                  | 3.16              |
| dLN 1            | 500ng     | 74528              | 26892                 | 2.77              |
| dLN 2            | 500ng     | 62460              | 28414                 | 2.2               |
| dLN 3            | 500ng     | 39266              | 1781                  | 22.05             |
| Spleen 1         | 500ng     | 61992              | 27290                 | 2.27              |
| Spleen 2         | 500ng     | 64709              | 28596                 | 2.26              |
| Spleen 3         | 500ng     | 75714              | 28323                 | 2.67              |



Supplementary Table 2: Sequencing information for samples submitted for scRNA-seq related to Figure 2.

| Sample ID                | No. Cells             | Mean Reads/Cell  | Median Genes/Cell      | No. Reads            | Valid Barcodes         |
|--------------------------|-----------------------|------------------|------------------------|----------------------|------------------------|
| Tumor $T_{RM}$           | 2273                  | 473741           | 1228                   | 1076814147           | 0.969                  |
| Tumor $T_{Eff} / T_{EM}$ | 6859                  | 122127           | 1060                   | 837674652            | 0.976                  |
| Tumor $T_{CM}$           | 9424                  | 77281            | 1127                   | 728297585            | 0.977                  |
| Distant Mucosa $T_{RM}$  | 3679                  | 50324            | 1155                   | 185144103            | 0.971                  |
| Sample ID                | Sequencing Saturation | Q30 Bases in UMI | Reads Mapped to Genome | Total Genes Detected | Median UMI Counts/Cell |
| Tumor $T_{RM}$           | 0.971                 | 0.959            | 0.864                  | 14361                | 2915                   |
| Tumor $T_{Eff} / T_{EM}$ | 0.935                 | 0.96             | 0.899                  | 15152                | 2877                   |
| Tumor $T_{CM}$           | 0.883                 | 0.96             | 0.9                    | 15529                | 3659                   |
| Distant Mucosa $T_{RM}$  | 0.845                 | 0.979            | 0.944                  | 14616                | 3271                   |

Supplementary Table 3: QC analysis of TCR $\beta$  repertoire sequencing samples related to Figure 6.

| <b>Sample ID</b> | <b>Cells Sorted</b> | <b>Total Mapped Reads</b> | <b>Unique TCR Clonotypes</b> | <b>Mean Read Per TCR</b> |
|------------------|---------------------|---------------------------|------------------------------|--------------------------|
| CXCR6+           | 8769                | 21410                     | 6414                         | 3.34                     |
| CXCR6-           | 9674                | 15129                     | 5529                         | 2.74                     |
| Tumor Trm        | 13000               | 113246                    | 11730                        | 9.65                     |
| Distant Trm      | 11600               | 15554                     | 4074                         | 3.82                     |
